# Supplementary material for: Synergistic vacancy defects and bandgap engineering in an Ag/S co-doped Bi2O3-based sulfur oxide catalyst for efficient hydrogen evolution
Source: Royal Society of Chemistry journal article supplement (doi:10.1039/d3ta07726h), 2024-01-01
Supplement: d3ta07726h1.pdf [file d3ta07726h1.pdf]

## Supporting Information

### **Synergistic vacancy defect and bandgap engineering in Ag/S co-doped Bi<sub>2</sub>O<sub>3</sub>-based sulfur oxide catalyst for efficient hydrogen evolution**

Zhengjie Su<sup>1</sup>, Xinru Wu<sup>1</sup>, Dong-Hau Kuo<sup>2,\*</sup>, Baoqian Yang<sup>1</sup>, Binghong Wu<sup>1</sup>, Longyan Chen<sup>1</sup>, Pengkun Zhang<sup>1</sup>, Jinguo Lin<sup>1,\*</sup>, Xiaoyun Chen<sup>1,\*</sup>, Dongfang Lu<sup>1,\*</sup>

<sup>1</sup> College of Materials Engineering, Fujian Agriculture and Forestry University, Fuzhou 350002, China

<sup>2</sup> Department of Materials Science and Engineering & Graduate Institute of Energy and Sustainability Technology, National Taiwan University of Science and Technology, Taipei 10607, Taiwan

\*Corresponding author

*E-mail address:* [dhkuo@mail.ntust.edu.tw](mailto:dhkuo@mail.ntust.edu.tw) (D. H. Kuo)

*E-mail address:* [fjldf@126.com](mailto:fjldf@126.com) (D. Lu)

*E-mail address:* [fjlinjg@126.com](mailto:fjlinjg@126.com) (J. Lin)

*E-mail address:* [fjchenxy@126.com](mailto:fjchenxy@126.com) (X. Chen)

## Experimental Section

### 1. Apparent quantum efficiency computation

According to the literature reports [1-3] for measuring the apparent quantum efficiency (AQE). The experiment was measured under the photocatalytic reaction conditions of monochromatic light of 420 nm ( $\lambda$ ), average radiation intensity (I) of 2.87 mW/cm<sup>2</sup>, and irradiation area (A) of 40.12 cm<sup>2</sup>. The total H<sub>2</sub> evolution with 50 mg of Ag/S-Bi<sub>2</sub>O<sub>3</sub> catalyst was 378.6  $\mu$ mol, which can be used to determine the reacted photons ( $N_{\text{reac}}$ ). The number of photons ( $N_{\text{in}}$ ) illuminated to the reactor is computed according to the following equations:

$$N_{\text{in}} = \frac{E \times \lambda}{h \times c} = \frac{A \times I \times t \times \lambda}{h \times c} = \frac{40.12 \times 2.87 \times 10^{-3} \times 3600 \times 6 \times 420 \times 10^{-9}}{6.626 \times 10^{-34} \times 3 \times 10^8} = 5.255 \times 10^{21}$$

$$\text{AQE} = \frac{N_{\text{reac}}}{N_{\text{in}}} \times 100\% = \frac{2 \times 6.02 \times 10^{23} \times 378.6 \times 10^{-6}}{5.255 \times 10^{21}} \times 100\% = 8.67\%$$

## Additional figures and tables

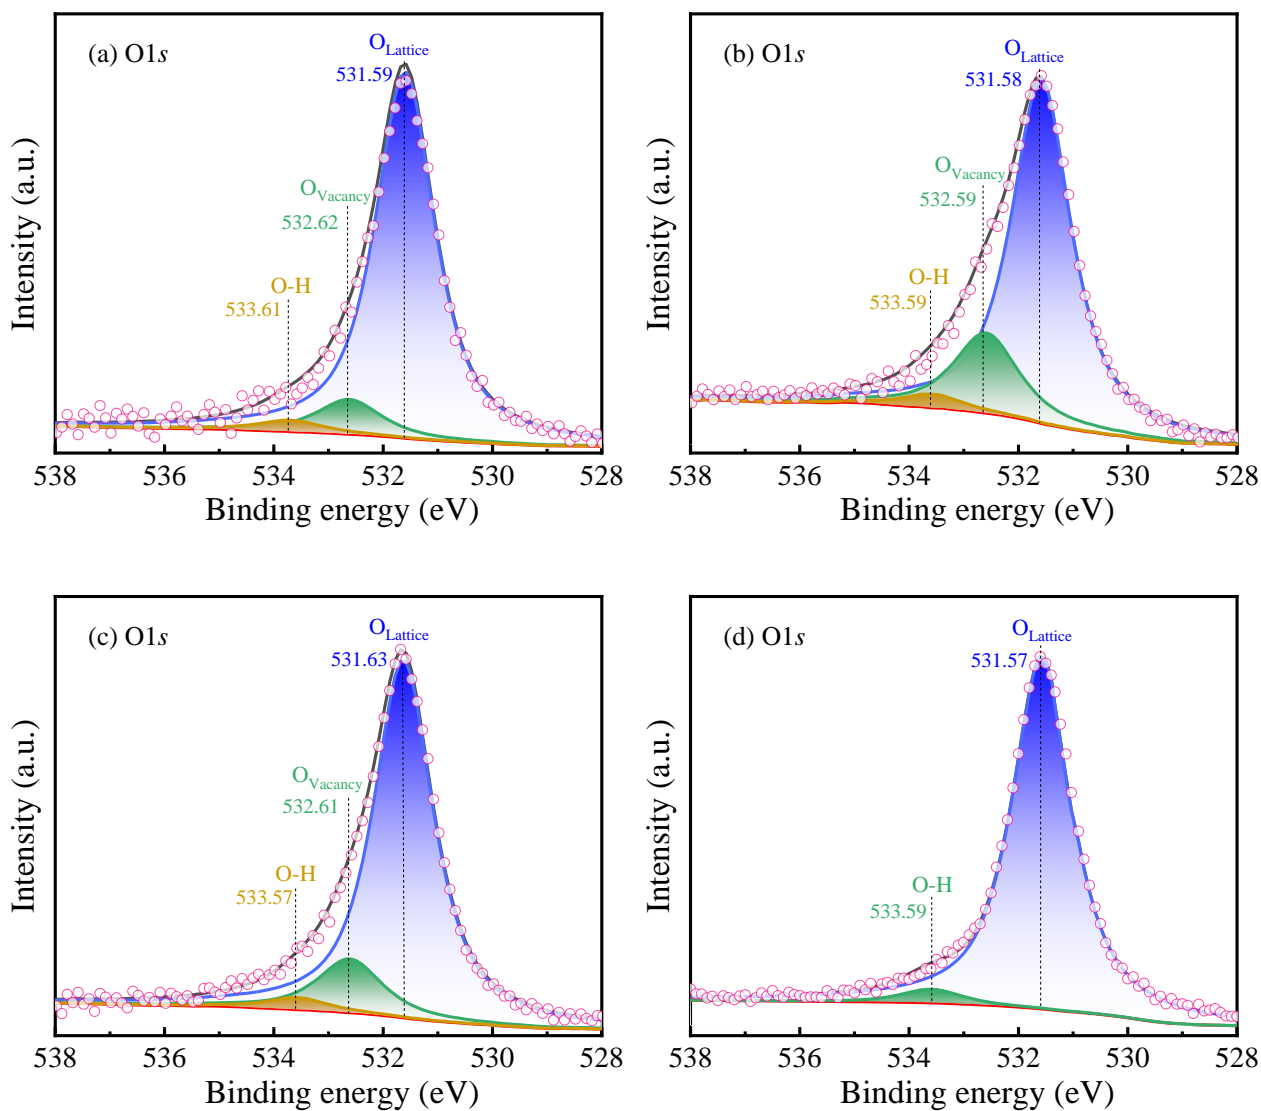

Fig. S1 O1s spectrums for (a) Ag/S-Bi<sub>2</sub>O<sub>3</sub>-1, (b) Ag/S-Bi<sub>2</sub>O<sub>3</sub>-2, (c) Ag/S-Bi<sub>2</sub>O<sub>3</sub>-4, and (d) Bi<sub>2</sub>O<sub>3</sub>.

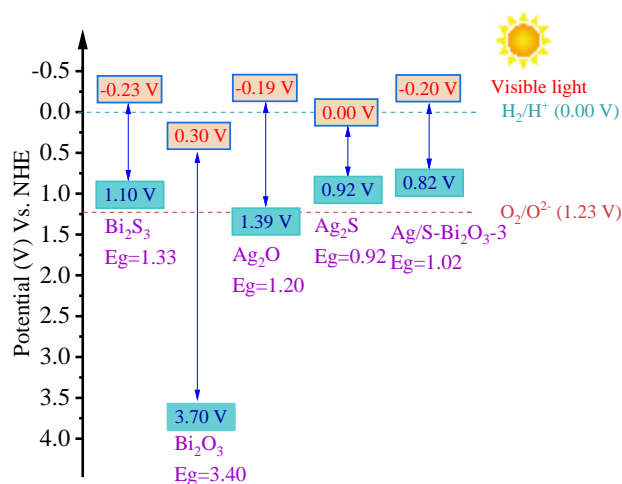

Fig. S2 Schematic band structure diagrams for Bi<sub>2</sub>S<sub>3</sub>, Bi<sub>2</sub>O<sub>3</sub>, Ag<sub>2</sub>O, Ag<sub>2</sub>S and Ag/S-Bi<sub>2</sub>O<sub>3</sub>.

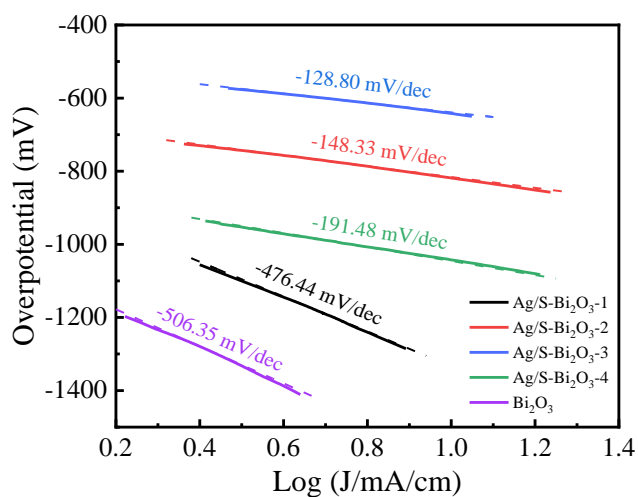

Fig. S3 Tafel slope of Ag/S-Bi<sub>2</sub>O<sub>3</sub> and Bi<sub>2</sub>O<sub>3</sub> catalysts

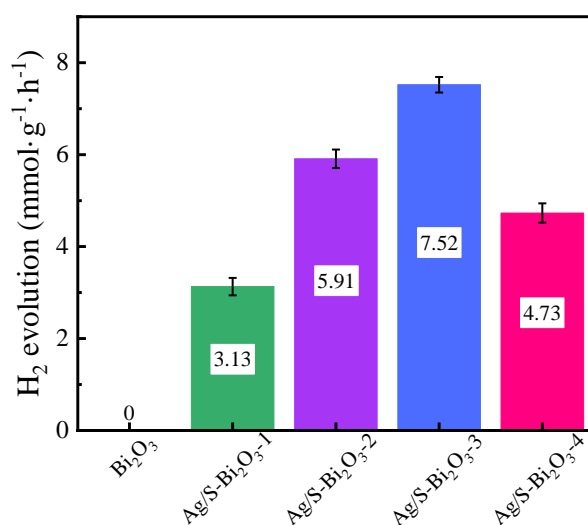

Fig. S4 Photocatalytic hydrogen evolution with the variation of time

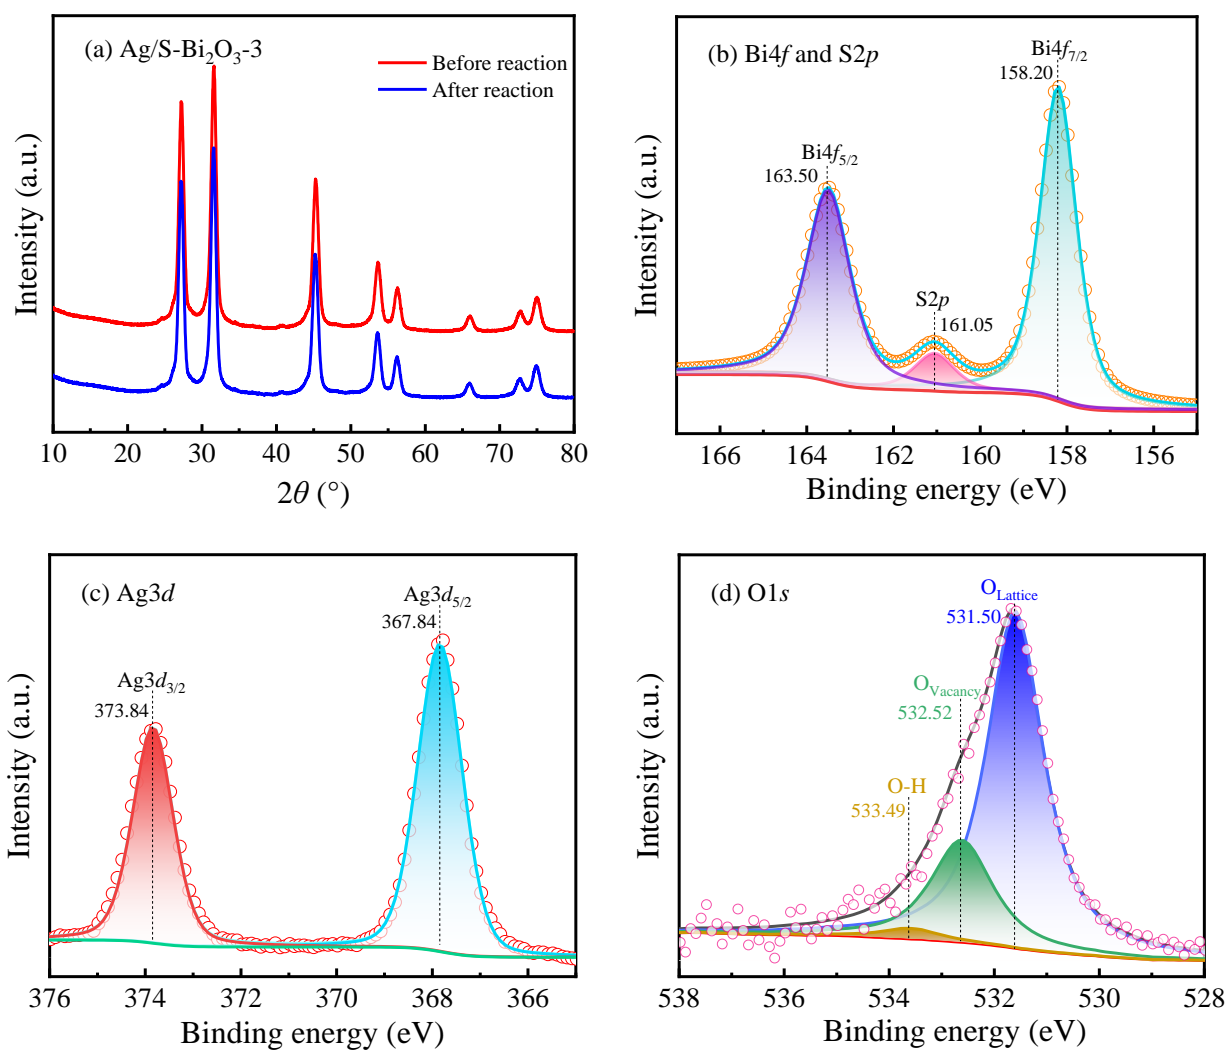

**Fig. S5** (a) XRD patterns of Ag/S-Bi<sub>2</sub>O<sub>3</sub>-3 after reusability reaction 6 times. XPS analyses for (b) Bi 4f and S 2p, (c) Ag 3d, and (d) O 1s.

**Table S1** XPS composition,  $V_O$  (%), crystal, and  $S_{BET}$  analyses of Ag/S-Bi<sub>2</sub>O<sub>3</sub> and Bi<sub>2</sub>O<sub>3</sub> catalysts

| Catalyst                                                 | Atomic percentage/% |       |       |       | $V_O$ (%) | Crystal size (nm) | $S_{BET}$ (m <sup>2</sup> /g) | Pore volume (cm <sup>3</sup> /g) |
|----------------------------------------------------------|---------------------|-------|-------|-------|-----------|-------------------|-------------------------------|----------------------------------|
|                                                          | Bi                  | Ag    | S     | O     |           |                   |                               |                                  |
| Ag/S-Bi <sub>2</sub> O <sub>3</sub> -1                   | 21.33               | 18.47 | 13.51 | 46.69 | 6.61      | 17.4              | 38.9                          | 0.291                            |
| Ag/S-Bi <sub>2</sub> O <sub>3</sub> -2                   | 21.02               | 18.69 | 14.92 | 45.37 | 11.65     | 15.6              | 39.8                          | 0.306                            |
| Ag/S-Bi <sub>2</sub> O <sub>3</sub> -3                   | 21.49               | 18.28 | 15.64 | 44.59 | 15.70     | 11.3              | 40.5                          | 0.312                            |
| Ag/S-Bi <sub>2</sub> O <sub>3</sub> -4                   | 21.52               | 18.14 | 16.73 | 43.61 | 9.74      | 10.7              | 39.7                          | 0.298                            |
| Bi <sub>2</sub> O <sub>3</sub>                           | 38.31               | N/A   | N/A   | 61.69 | N/A       | 32.9              | 27.1                          | 0.171                            |
| After reaction<br>Ag/S-Bi <sub>2</sub> O <sub>3</sub> -3 | 20.83               | 19.17 | 15.03 | 44.97 | 15.49     | 11.7              | 39.7                          | 0.307                            |

**Table S2** Elements contents from SEM-EDS analysis for BiAgSO and Bi<sub>2</sub>O<sub>3</sub> catalysts

| Catalyst                               | Bi    | Ag    | S     | O     |
|----------------------------------------|-------|-------|-------|-------|
| Ag/S-Bi <sub>2</sub> O <sub>3</sub> -1 | 22.36 | 17.63 | 16.09 | 43.92 |
| Ag/S-Bi <sub>2</sub> O <sub>3</sub> -2 | 22.17 | 17.54 | 15.94 | 44.35 |
| Ag/S-Bi <sub>2</sub> O <sub>3</sub> -3 | 22.56 | 17.19 | 14.91 | 45.34 |
| Ag/S-Bi <sub>2</sub> O <sub>3</sub> -4 | 22.49 | 17.58 | 13.42 | 46.51 |
| Bi <sub>2</sub> O <sub>3</sub>         | 38.18 | N/A   | N/A   | 61.82 |

**Table S3** XRF chemical elements composition of Ag/S-Bi<sub>2</sub>O<sub>3</sub> and Bi<sub>2</sub>O<sub>3</sub> catalysts

| Catalyst                               | Bi    | Ag    | S     | O     |
|----------------------------------------|-------|-------|-------|-------|
| Ag/S-Bi <sub>2</sub> O <sub>3</sub> -1 | 21.11 | 18.07 | 17.09 | 43.73 |
| Ag/S-Bi <sub>2</sub> O <sub>3</sub> -2 | 21.20 | 18.15 | 16.24 | 44.41 |
| Ag/S-Bi <sub>2</sub> O <sub>3</sub> -3 | 20.88 | 18.46 | 15.31 | 45.35 |
| Ag/S-Bi <sub>2</sub> O <sub>3</sub> -4 | 20.48 | 18.50 | 14.42 | 46.60 |
| Bi <sub>2</sub> O <sub>3</sub>         | 38.26 | N/A   | N/A   | 61.74 |

**Table S4** Reports on PHER performance over Bi-based and oxysulfide catalysts under visible light

| Catalyst                                                           | Sacrificial agent                                 | Light source  | AQE(%)            | PHER rate (mmol/g/h) | Refs.     |
|--------------------------------------------------------------------|---------------------------------------------------|---------------|-------------------|----------------------|-----------|
| g-C <sub>3</sub> N <sub>4</sub> /Au/BiVO <sub>4</sub>              | 10 vol% triethanol amine                          | 300 W Xe      | N/A               | 2.986                | [4]       |
| BiOBr/Bi <sub>2</sub> S <sub>3</sub>                               | Na <sub>2</sub> S/Na <sub>2</sub> SO <sub>3</sub> | 300 W Xe      | N/A               | 1.03                 | [5]       |
| ZnO/Ag/Bi <sub>2</sub> S <sub>3</sub>                              | Na <sub>2</sub> S/Na <sub>2</sub> SO <sub>3</sub> | 250 W Hg      | 1.1 (420 nm)      | 0.218                | [6]       |
| Bi <sub>2</sub> S <sub>3</sub> /MoS <sub>2</sub> /TiO <sub>2</sub> | Na <sub>2</sub> S/Na <sub>2</sub> SO <sub>3</sub> | 250 W Xe      | N/A               | 2.23                 | [7]       |
| Bi <sub>2</sub> S <sub>3</sub> /WO <sub>3</sub>                    | 5 vol% glycerol                                   | Visible light | 2.99 (450 ± 5 nm) | 9.91                 | [8]       |
| FeS <sub>2</sub> /Bi <sub>2</sub> S <sub>3</sub>                   | Na <sub>2</sub> S/Na <sub>2</sub> SO <sub>3</sub> | 300 W Xe      | 12.1 (420 nm)     | 16.8                 | [9]       |
| Bi/Bi <sub>2</sub> MoO <sub>6</sub> -MoS <sub>2</sub>              | 5 vol% triethanol amine                           | 150 W Xe      | 15.8 (>420 nm)    | 2.185                | [10]      |
| BSxBWO                                                             | 10 vol% triethanol amine                          | 250 W Xe      | N/A               | 0.92                 | [11]      |
| Bi <sub>2</sub> S <sub>3</sub> /TiO <sub>2</sub>                   | 50 vol% methanol                                  | 300 W Xe      | N/A               | 2.46                 | [12]      |
| CdS/Bi <sub>2</sub> S <sub>3</sub>                                 | Na <sub>2</sub> S/Na <sub>2</sub> SO <sub>3</sub> | 300 W Xe      | N/A               | 0.54                 | [13]      |
| Bi/ZCS                                                             | Na <sub>2</sub> S/Na <sub>2</sub> SO <sub>3</sub> | 300 W Xe      | 31.5 (420 nm)     | 109                  | [14]      |
| Bi <sub>2</sub> O <sub>3</sub> /BiVO <sub>4</sub>                  | Na <sub>2</sub> S/Na <sub>2</sub> SO <sub>3</sub> | Visible light | N/A               | 0.171                | [15]      |
| Bi/Bi <sub>5</sub> O <sub>7</sub> I/Sn <sub>3</sub> O <sub>4</sub> | 20 vol% methanol                                  | 300 W Xe      | N/A               | 0.326                | [16]      |
| Bi <sub>5</sub> O <sub>7</sub> Br/Ti <sub>3</sub> C <sub>2</sub>   | 40 vol% methanol                                  | 300 W Xe      | N/A               | 0.079                | [17]      |
| Ag/S-Bi <sub>2</sub> O <sub>3</sub>                                | Na <sub>2</sub> S/Na <sub>2</sub> SO <sub>3</sub> | 300 W Xe      | 8.67 (420 nm)     | 7.52                 | This work |

## References:

- [1] C. Imparato, G. Iervolino, M. Fantauzzi, C. Koral, W. Macky, M. Kobielski, G. D'Errico, I. Rea, R.D. Girolamo, L.D. Stefano, A. Andreone, V. Vaiano, A. Rossi, A. Aronne, Photocatalytic hydrogen evolution by cocatalyst free TiO<sub>2</sub>/C bulk heterostructures synthesized under mild conditions, *RSC Adv.*, 10 (2020) 12519-12534.
- [2] M.S. Nasir, G. Yang, I. Ayub, S. Wang, W. Yan, Tin diselenide a stable co-catalyst coupled with branched TiO<sub>2</sub> fiber and g-C<sub>3</sub>N<sub>4</sub> quantum dots for photocatalytic hydrogen evolution, *Appl. Catal. B-Environ.*, 270 (2020) 118900.
- [3] U. Bharagav, N.R. Reddy, V.N. Rao, P. Ravi, M. Sathish, M.V. Shankar, T.M. Aminabhavi, R.R. Kakarla, M.M. Kumari, Z-scheme driven photocatalytic activity of CNTs-integrated Bi<sub>2</sub>S<sub>3</sub>/WO<sub>3</sub> nanohybrid catalysts for highly efficient hydrogen evolution under solar light irradiation, *Chem. Eng. J.*, 465 (2023) 142886.
- [4] R. Muthukumar, G. Balaji, S. Vadivel, The charge transfer pathway of g-C<sub>3</sub>N<sub>4</sub> decorated Au/Bi(VO<sub>4</sub>) composites for highly efficient photocatalytic hydrogen evolution, *Int. J. Hydrogen Energ.*, 48 (2023) 23856-23865.
- [5] C.-J. Chang, C.-L. Huang, Y.-H. Yu, M.-C. Teng, C. Chiang, Y.-G. Lin, Electron transfer dynamics and enhanced H<sub>2</sub> production activity of hydrangea-like BiOBr/Bi<sub>2</sub>S<sub>3</sub>-based photocatalysts with Cu-complex as a redox mediator, *Appl. Surf. Sci.*, 576 (2021) 151870.
- [6] S. Mandal, R. Ananthakrishnan, Double effects of interfacial Ag nanoparticles in a ZnO multipod@Ag@Bi<sub>2</sub>S<sub>3</sub> Z-Scheme photocatalytic redox system: Concurrent tuning and improving charge-transfer efficiency, *Inorg. Chem.*, 59 (2020) 7681-7699.
- [7] Q.A. Drmosh, A. Hezam, A.H.Y. Hendi, M. Qamar, Z.H. Yamani, K. Byrappa, Ternary Bi<sub>2</sub>S<sub>3</sub>/MoS<sub>2</sub>/TiO<sub>2</sub> with double Z-scheme configuration as high performance photocatalyst, *Appl.*



*Surf. Sci.*, 499 (2020) 143938.

- [8] U. Bharagav, N.R. Reddy, V.N. Rao, P. Ravi, M. Sathish, M.V. Shankar, T.M. Aminabhavi, R.R. Kakarla, M.M. Kumari, Z-scheme driven photocatalytic activity of CNTs-integrated Bi<sub>2</sub>S<sub>3</sub>/WO<sub>3</sub> nanohybrid catalysts for highly efficient hydrogen evolution under solar light irradiation, *Chem. Eng. J.*, 465 (2023) 142886.
- [9] M. Li, J. Sun, G. Chen, S. Yao, B. Cong, P. Liu, Construction photothermal/pyroelectric property of hollow FeS<sub>2</sub>/Bi<sub>2</sub>S<sub>3</sub> nanostructure with enhanced full spectrum photocatalytic activity, *Appl. Catal. B-Environ.*, 298 (2021) 120573.
- [10] R.K. Chava, N. Son, M. Kang, Surface engineering of CdS with ternary Bi/Bi<sub>2</sub>MoO<sub>6</sub>-MoS<sub>2</sub> heterojunctions for enhanced photoexcited charge separation in solar-driven hydrogen evolution reaction, *Appl. Surf. Sci.*, 565 (2021) 150601.
- [11] R. Bariki, Y.P. Bhoi, S.K. Pradhan, S. Panda, S.K. Nayak, K. Das, D. Majhi, B.G. Mishra, Oxygen defect rich Bi<sub>2</sub>S<sub>3</sub>/SnS<sub>2</sub>/Bi-self doped Bi<sub>2</sub>W<sub>2</sub>O<sub>9</sub> multijunction photocatalyst for enhanced degradation of methyl parathion and H<sub>2</sub> evolution, *Sep. Purif. Technol.*, 324 (2023) 124509.
- [12] H. Lin, K. Zhang, G. Yang, Y. Li, X. Liu, K. Chang, Y. Xuan, J. Ye, Ultrafine nano 1T-MoS<sub>2</sub> monolayers with NiO<sub>x</sub> as dual co-catalysts over TiO<sub>2</sub> photo harvester for efficient photocatalytic hydrogen evolution, *Appl. Catal. B-Environ.*, 279 (2020) 119387.
- [13] M. Li, H. Yao, S. Yao, G. Chen, J. Sun, Vacancy-induced tensile strain of CdS/Bi<sub>2</sub>S<sub>3</sub> as a highly performance and robust photocatalyst for hydrogen evolution, *J. Colloid Interface Sci.*, 630 (2023) 224-234.
- [14] G. Yang, T. Chen, H. Liu, C. Xing, G. Yu, X. Li, Bi-doped twin crystal Zn<sub>0.5</sub>Cd<sub>0.5</sub>S photocatalyst for highly efficient photocatalytic hydrogen production from water, *Appl. Surf. Sci.*, 615 (2023) 156393.

- [15] F. Shafiq, M.B. Tahir, A. Hussain, M. Sagir, J.U. Rehman, I. Kebaili, H. Alrobei, M. Alzaid, The construction of a highly efficient p-n heterojunction  $\text{Bi}_2\text{O}_3/\text{BiVO}_4$  for hydrogen evolution through solar water splitting, *Int. J. Hydrogen Energ.*, 47 (2022) 4594-4600.
- [16] L. Xu, W. Chen, S. Ke, S. Zhang, M. Zhu, Y. Zhang, W. Shi, S. Horike, L. Tang, Construction of heterojunction  $\text{Bi}/\text{Bi}_5\text{O}_7\text{I}/\text{Sn}_3\text{O}_4$  for efficient noble-metal-free Z-scheme photocatalytic  $\text{H}_2$  evolution, *Chem. Eng. J.*, 382 (2020) 122810.
- [17] F. Xie, Q. Xi, H. Li, X. Jian, J. Liu, X. Zhang, Y. Wang, R. Li, C. Fan, Two-dimensional/two-dimensional heterojunction-induced accelerated charge transfer for photocatalytic hydrogen evolution over  $\text{Bi}_5\text{O}_7\text{Br}/\text{Ti}_3\text{C}_2$ : Electronic directional transport, *J. Colloid Interface Sci.*, 617 (2022) 53-64.
